# Supplementary material for: The apheresis platelet donation was increased after a nationwide ban on family/replacement donation in China
Source: Springer Nature journal article supplement (doi:10.1186/s12889-021-10819-4), 2021-04-29
Supplement: MOESM2 [file 19118314]

**Additional file 2. Demographics of individual plateletpheresis donors in CDBC.**

|                                           | 2012/10<br>-2013/3 | 2013/4<br>-2013/9 | 2013/10<br>-2014/3 | 2014/4<br>-2014/9 | 2014/10<br>-2015/3 | 2015/4<br>-2015/9 | 2015/10<br>-2016/3 | 2016/4<br>-2016/9 | 2016/10<br>-2017/3 | 2017/4<br>-2017/9 | 2017/10<br>-2018/3 | <b>2018/4<br/>-2018/9</b> | <b>2018/10<br/>-2019/3</b> | <b>2019/4<br/>-2019/9</b> |
|-------------------------------------------|--------------------|-------------------|--------------------|-------------------|--------------------|-------------------|--------------------|-------------------|--------------------|-------------------|--------------------|---------------------------|----------------------------|---------------------------|
| <b>Gender</b>                             |                    |                   |                    |                   |                    |                   |                    |                   |                    |                   |                    |                           |                            |                           |
| Male, n (%)                               | 2 786<br>(66.7)    | 3 156<br>(64.8)   | 4 076<br>(74.4)    | 4 456<br>(74.1)   | 4 547<br>(72.3)    | 4 612<br>(73.4)   | 4 842<br>(73.2)    | 5 291<br>(72.1)   | 5 013<br>(72.1)    | 5 305<br>(75.5)   | 5 107<br>(75.2)    | 3 435<br>(67.2)           | 3 075<br>(66.5)            | 2 864<br>(63.3)           |
| Female, n (%)                             | 1 393<br>(33.3)    | 1 717<br>(35.2)   | 1 402<br>(25.6)    | 1 561<br>(25.9)   | 1 743<br>(27.7)    | 1 675<br>(26.6)   | 1 777<br>(26.8)    | 2 052<br>(27.9)   | 1 944<br>(27.9)    | 1 725<br>(24.5)   | 1 686<br>(24.8)    | 1 680<br>(32.8)           | 1 551<br>(33.5)            | 1 658<br>(36.7)           |
| <b>Age</b>                                |                    |                   |                    |                   |                    |                   |                    |                   |                    |                   |                    |                           |                            |                           |
| ≤35y, n (%)                               | 2 617<br>(62.6)    | 3 010<br>(61.8)   | 3 511<br>(64.1)    | 3 898<br>(64.8)   | 4 077<br>(64.8)    | 4 284<br>(68.1)   | 4 512<br>(68.2)    | 5 272<br>(71.8)   | 5 086<br>(73.1)    | 5 228<br>(74.4)   | 4 970<br>(73.2)    | 3 442<br>(67.3)           | 3 131<br>(67.7)            | 3 170<br>(70.1)           |
| >35y, n (%)                               | 1 562<br>(37.4)    | 1 863<br>(38.2)   | 1 967<br>(35.9)    | 2 119<br>(35.2)   | 2 213<br>(35.2)    | 2 003<br>(31.9)   | 2 107<br>(31.8)    | 2 071<br>(28.2)   | 1 871<br>(26.9)    | 1 802<br>(25.6)   | 1 823<br>(26.8)    | 1 673<br>(32.7)           | 1 495<br>(32.3)            | 1 352<br>(29.9)           |
| <b>Blood donation history<sup>a</sup></b> |                    |                   |                    |                   |                    |                   |                    |                   |                    |                   |                    |                           |                            |                           |
| None, n (%)                               | 2 483<br>(59.4)    | 3 005<br>(61.7)   | 3 798<br>(69.3)    | 4 271<br>(71.0)   | 4 398<br>(69.9)    | 4 200<br>(66.8)   | 4 569<br>(69.0)    | 5 051<br>(68.8)   | 4 480<br>(64.4)    | 4 332<br>(61.6)   | 4 006<br>(59.0)    | 1 847<br>(36.1)           | 1 592<br>(34.4)            | 1 250<br>(27.6)           |
| WB, n (%)                                 | 468<br>(11.2)      | 621<br>(12.7)     | 592<br>(10.8)      | 651<br>(10.8)     | 739<br>(11.7)      | 891<br>(14.2)     | 780<br>(11.8)      | 879<br>(12)       | 889<br>(12.8)      | 856<br>(12.2)     | 959<br>(14.1)      | 984<br>(19.2)             | 664<br>(14.4)              | 666<br>(14.7)             |
| PLT, n (%)                                | 699<br>(16.7)      | 722<br>(14.8)     | 606<br>(11.1)      | 617<br>(10.3)     | 694<br>(11)        | 726<br>(11.5)     | 774<br>(11.7)      | 848<br>(11.5)     | 979<br>(14.1)      | 1 171<br>(16.7)   | 1 105<br>(16.3)    | 1 347<br>(26.3)           | 1 278<br>(27.6)            | 1 419<br>(31.4)           |
| Both, n (%)                               | 529<br>(12.7)      | 525<br>(10.8)     | 482<br>(8.8)       | 478<br>(7.9)      | 459<br>(7.3)       | 470<br>(7.5)      | 496<br>(7.5)       | 565<br>(7.7)      | 609<br>(8.8)       | 671<br>(9.5)      | 723<br>(10.6)      | 937<br>(18.3)             | 1 092<br>(23.6)            | 1 187<br>(26.2)           |
| <b>FRD donation in current interval</b>   |                    |                   |                    |                   |                    |                   |                    |                   |                    |                   |                    |                           |                            |                           |
| Yes, n (%)                                | 386<br>(5.8)       | 828<br>(11.2)     | 2 789<br>(37.1)    | 3 906<br>(47.8)   | 3 096<br>(35.1)    | 2 879<br>(31.8)   | 4 980<br>(52.1)    | 5 643<br>(52.6)   | 4 689<br>(40.9)    | 4 798<br>(40.9)   | 3 625<br>(30.9)    | 0<br>(0.0)                | 0<br>(0.0)                 | 0<br>(0.0)                |
| No, n (%)                                 | 6 281<br>(94.2)    | 6 571<br>(88.8)   | 4 719<br>(62.9)    | 4 259<br>(52.2)   | 5 718<br>(64.9)    | 6 185<br>(68.2)   | 4 576<br>(47.9)    | 5 092<br>(47.4)   | 6 788<br>(59.1)    | 6 925<br>(59.1)   | 8 106<br>(69.1)    | 12386<br>(100.0)          | 12125<br>(100.0)           | 12895<br>(100.0)          |

**Bold cross-sections** denote the ones after the ban on FRD.

<sup>a</sup>:"None"=no blood donation history; "WB"=whole blood donation history only; "PLT"=plateletpheresis donation history only; "Both"=both whole blood and plateletpheresis donations history.
