# Supplementary material for: The apheresis platelet donation was increased after a nationwide ban on family/replacement donation in China
Source: Springer Nature journal article supplement (doi:10.1186/s12889-021-10819-4), 2021-04-29
Supplement: MOESM3 [file 19118314]

**Additional file 3. Total number of plateletpheresis donations/donors/units and average number of plateletpheresis donations/units in GZBC.**

|                                     | 2012/10  | 2013/4   | 2013/10  | 2014/4   | 2014/10  | 2015/4   | 2015/10 | 2016/4   | 2016/10  | 2017/4   | 2017/10  | <b>2018/4</b>  | <b>2018/10</b> | <b>2019/4</b>  |
|-------------------------------------|----------|----------|----------|----------|----------|----------|---------|----------|----------|----------|----------|----------------|----------------|----------------|
|                                     | -2013/3  | -2013/9  | -2014/3  | -2014/9  | -2015/3  | -2015/9  | -2016/3 | -2016/9  | -2017/3  | -2017/9  | -2018/3  | <b>-2018/9</b> | <b>-2019/3</b> | <b>-2019/9</b> |
| Total #donations                    | 14 225   | 15 324   | 15 100   | 16 960   | 17 168   | 18 630   | 19 131  | 19 605   | 18 948   | 20 235   | 19 853   | 17 742         | 22 023         | 25 222         |
| Total units                         | 22 971.5 | 24 271.8 | 23 843.8 | 26 838.5 | 27 326.0 | 29 653.8 | 30 636  | 31 796.5 | 31 557.5 | 33 906.8 | 33 790.2 | 30 625         | 39 261         | 45 389         |
| Total #donors                       | 7 619    | 8 634    | 8 582    | 9 728    | 10 229   | 11 112   | 11 457  | 11 510   | 11 346   | 11 556   | 11 488   | 6 481          | 7 847          | 8 262          |
| Average total #donations per donor  | 1.9      | 1.8      | 1.8      | 1.7      | 1.7      | 1.7      | 1.7     | 1.7      | 1.7      | 1.8      | 1.7      | 2.7            | 2.8            | 3.1            |
| Average total units per donor       | 3.0      | 2.8      | 2.8      | 2.8      | 2.7      | 2.7      | 2.7     | 2.8      | 2.8      | 2.9      | 2.9      | 4.7            | 5.0            | 5.5            |
| Gender                              |          |          |          |          |          |          |         |          |          |          |          |                |                |                |
| Average #donations per male         | 2.0      | 1.9      | 1.9      | 1.9      | 1.8      | 1.8      | 1.8     | 1.8      | 1.8      | 1.9      | 1.8      | 3.1            | 3.1            | 3.4            |
| Average #donations per female       | 1.5      | 1.4      | 1.4      | 1.4      | 1.3      | 1.3      | 1.3     | 1.3      | 1.3      | 1.4      | 1.4      | 1.8            | 2.0            | 2.0            |
| Average units per male              | 3.3      | 3.1      | 3.1      | 3.1      | 3.0      | 3.0      | 3.0     | 3.0      | 3.0      | 3.2      | 3.2      | 5.4            | 5.6            | 6.2            |
| Average units per female            | 2.2      | 2.0      | 2.0      | 2.0      | 1.9      | 1.9      | 1.9     | 2.0      | 2.0      | 2.0      | 2.1      | 2.8            | 3.2            | 3.3            |
| Age                                 |          |          |          |          |          |          |         |          |          |          |          |                |                |                |
| Average #donations per donor (≤35)  | 1.7      | 1.6      | 1.6      | 1.6      | 1.6      | 1.6      | 1.5     | 1.6      | 1.5      | 1.6      | 1.6      | 2.5            | 2.6            | 2.8            |
| Average #donations per donor (>35)  | 2.3      | 2.2      | 2.2      | 2.1      | 2.0      | 2.0      | 2.2     | 2.2      | 2.2      | 2.3      | 2.3      | 3.3            | 3.5            | 3.7            |
| Average units per donor (≤35)       | 2.8      | 2.6      | 2.5      | 2.6      | 2.5      | 2.5      | 2.4     | 2.5      | 2.5      | 2.7      | 2.6      | 4.3            | 4.5            | 5.1            |
| Average units per donor (>35)       | 3.9      | 3.6      | 3.7      | 3.4      | 3.3      | 3.3      | 3.6     | 3.7      | 3.9      | 3.9      | 4.1      | 5.9            | 6.4            | 6.8            |
| FRD donation status                 |          |          |          |          |          |          |         |          |          |          |          |                |                |                |
| Average #donations per voluntary    | 2.1      | 2.2      | 2.2      | 2.3      | 2.3      | 2.3      | 2.2     | 2.6      | 2.4      | 2.7      | 1.9      | 2.7            | 2.8            | 3.1            |
| Average #donations per FRD          | 1.05     | 1.07     | 1.05     | 1.06     | 1.07     | 1.07     | 1.06    | 1.08     | 1.08     | 1.12     | 1.06     | NA             | NA             | NA             |
| Average units per voluntary         | 3.5      | 3.6      | 3.6      | 3.8      | 3.8      | 3.9      | 3.8     | 4.3      | 4.1      | 4.6      | 3.3      | 4.7            | 5.0            | 5.5            |
| Average units per FRD               | 1.6      | 1.6      | 1.5      | 1.5      | 1.5      | 1.6      | 1.6     | 1.6      | 1.7      | 1.8      | 1.8      | NA             | NA             | NA             |
| Blood donation history <sup>a</sup> |          |          |          |          |          |          |         |          |          |          |          |                |                |                |
| Average #donations per WB           | 1.3      | 1.2      | 1.2      | 1.2      | 1.2      | 1.2      | 1.2     | 1.2      | 1.2      | 1.3      | 1.2      | 1.9            | 1.9            | 1.9            |
| Average #donations per PLT          | 2.5      | 2.5      | 2.6      | 2.6      | 2.6      | 2.6      | 2.6     | 2.6      | 2.5      | 2.5      | 2.6      | 3.4            | 3.7            | 3.7            |
| Average #donations per Both         | 3.4      | 3.4      | 3.4      | 3.5      | 3.4      | 3.4      | 3.2     | 3.3      | 3.1      | 3.0      | 2.9      | 3.8            | 4.1            | 4.1            |
| Average #donations per None         | 1.2      | 1.2      | 1.2      | 1.2      | 1.1      | 1.2      | 1.2     | 1.2      | 1.1      | 1.2      | 1.1      | 1.6            | 1.5            | 1.8            |
| Average units per WB                | 1.9      | 1.8      | 1.8      | 1.8      | 1.8      | 1.7      | 1.8     | 1.8      | 1.8      | 2.0      | 1.9      | 3.0            | 3.2            | 3.2            |
| Average units per PLT               | 4.3      | 4.1      | 4.2      | 4.4      | 4.3      | 4.5      | 4.5     | 4.5      | 4.4      | 4.4      | 4.7      | 6.2            | 6.9            | 6.7            |
| Average units per Both              | 6.1      | 6.0      | 6.2      | 6.3      | 6.1      | 6.0      | 5.6     | 5.8      | 5.6      | 5.4      | 5.4      | 6.8            | 7.6            | 7.6            |
| Average units per None              | 1.8      | 1.6      | 1.7      | 1.6      | 1.6      | 1.6      | 1.7     | 1.7      | 1.7      | 1.8      | 1.7      | 2.4            | 2.5            | 2.9            |

**Bold cross-sections** denote the ones after the ban on FRD.

<sup>a</sup>"None"=no blood donation history; "WB"=whole blood donation history only; "PLT"=plateletpheresis donation history only; "Both"=both whole blood and plateletpheresis donations history.
