# Supplementary material for: The apheresis platelet donation was increased after a nationwide ban on family/replacement donation in China
Source: Springer Nature journal article supplement (doi:10.1186/s12889-021-10819-4), 2021-04-29
Supplement: MOESM4 [file 19118314]

**Additional file 4. Total number of plateletpheresis donations/donors/units and average number of plateletpheresis donations/units in CDBC.**

|                                     | 2012/10<br>-2013/3 | 2013/4<br>-2013/9 | 2013/10<br>-2014/3 | 2014/4<br>-2014/9 | 2014/10<br>-2015/3 | 2015/4<br>-2015/9 | 2015/10<br>-2016/3 | 2016/4<br>-2016/9 | 2016/10<br>-2017/3 | 2017/4<br>-2017/9 | 2017/10<br>-2018/3 | <b>2018/4<br/>-2018/9</b> | <b>2018/10<br/>-2019/3</b> | <b>2019/4<br/>-2019/9</b> |
|-------------------------------------|--------------------|-------------------|--------------------|-------------------|--------------------|-------------------|--------------------|-------------------|--------------------|-------------------|--------------------|---------------------------|----------------------------|---------------------------|
| Total #donations                    | 6 667              | 7 399             | 7 508              | 8 165             | 8 814              | 9 064             | 9 556              | 10 735            | 11 477             | 11 723            | 11 731             | 12 386                    | 12 125                     | 12 895                    |
| Total units                         | 9 948.0            | 10 933.0          | 10 905.0           | 10 662.0          | 12 020.0           | 12 232.8          | 12 787.0           | 13 671.0          | 15 633.0           | 15 588.0          | 16 454.0           | 19 335.6                  | 20 124.5                   | 22 215.0                  |
| Total #donors                       | 4 179              | 4 873             | 5 478              | 6 017             | 6 290              | 6 287             | 6 619              | 7 343             | 6 957              | 7 030             | 6 793              | 5 115                     | 4 626                      | 4 522                     |
| Average #donations per donor        | 1.6                | 1.5               | 1.4                | 1.4               | 1.4                | 1.4               | 1.4                | 1.5               | 1.6                | 1.7               | 1.7                | 2.4                       | 2.6                        | 2.9                       |
| Average units per donor             | 2.4                | 2.2               | 2.0                | 1.8               | 1.9                | 1.9               | 1.9                | 1.9               | 2.2                | 2.2               | 2.4                | 3.8                       | 4.4                        | 4.9                       |
| Gender                              |                    |                   |                    |                   |                    |                   |                    |                   |                    |                   |                    |                           |                            |                           |
| Average #donations per male         | 2.0                | 1.9               | 1.9                | 1.9               | 1.8                | 1.8               | 1.8                | 1.8               | 1.8                | 1.9               | 1.8                | 3.1                       | 3.1                        | 3.4                       |
| Average #donations per female       | 1.5                | 1.4               | 1.4                | 1.4               | 1.3                | 1.3               | 1.3                | 1.3               | 1.3                | 1.4               | 1.4                | 1.8                       | 2.0                        | 2.0                       |
| Average units per male              | 3.3                | 3.1               | 3.1                | 3.1               | 3.0                | 3.0               | 3.0                | 3.0               | 3.0                | 3.2               | 3.2                | 5.4                       | 5.6                        | 6.2                       |
| Average units per female            | 2.2                | 2.0               | 2.0                | 2.0               | 1.9                | 1.9               | 1.9                | 2.0               | 2.0                | 2.0               | 2.1                | 2.8                       | 3.2                        | 3.3                       |
| Age                                 |                    |                   |                    |                   |                    |                   |                    |                   |                    |                   |                    |                           |                            |                           |
| Average #donations per donor (≤35)  | 1.5                | 1.4               | 1.3                | 1.3               | 1.3                | 1.4               | 1.4                | 1.4               | 1.6                | 1.6               | 1.7                | 2.4                       | 2.6                        | 2.8                       |
| Average #donations per donor (>35)  | 1.7                | 1.6               | 1.5                | 1.5               | 1.5                | 1.6               | 1.5                | 1.5               | 1.7                | 1.7               | 1.8                | 2.4                       | 2.7                        | 3.0                       |
| Average units per donor (≤35)       | 2.3                | 2.1               | 1.9                | 1.7               | 1.8                | 1.9               | 1.9                | 1.8               | 2.2                | 2.2               | 2.4                | 3.8                       | 4.3                        | 4.8                       |
| Average units per donor (>35)       | 2.5                | 2.4               | 2.2                | 1.9               | 2.1                | 2.1               | 2.0                | 1.9               | 2.3                | 2.3               | 2.5                | 3.6                       | 4.5                        | 5.1                       |
| FRD donation status                 |                    |                   |                    |                   |                    |                   |                    |                   |                    |                   |                    |                           |                            |                           |
| Average #donations per voluntary    | 1.6                | 1.6               | 1.6                | 1.7               | 1.6                | 1.7               | 2.1                | 2.1               | 2.3                | 2.5               | 2.3                | 2.4                       | 2.6                        | 2.9                       |
| Average #donations per FRD          | 1.01               | 1.00              | 1.02               | 1.06              | 1.08               | 1.07              | 1.07               | 1.10              | 1.12               | 1.07              | 1.05               | NA                        | NA                         | NA                        |
| Average units per voluntary         | 2.5                | 2.4               | 2.5                | 2.4               | 2.3                | 2.3               | 3.2                | 3.0               | 3.3                | 3.6               | 3.4                | 3.8                       | 4.4                        | 4.9                       |
| Average units per FRD               | 1.3                | 1.3               | 1.4                | 1.3               | 1.3                | 1.3               | 1.3                | 1.3               | 1.4                | 1.3               | 1.3                | NA                        | NA                         | NA                        |
| Blood donation history <sup>a</sup> |                    |                   |                    |                   |                    |                   |                    |                   |                    |                   |                    |                           |                            |                           |
| Average #donations per WB           | 1.4                | 1.3               | 1.1                | 1.2               | 1.2                | 1.2               | 1.2                | 1.3               | 1.4                | 1.3               | 1.3                | 1.7                       | 1.6                        | 1.7                       |
| Average #donations per PLT          | 2.2                | 2.2               | 2.1                | 2.1               | 2.3                | 2.5               | 2.5                | 2.5               | 2.9                | 2.8               | 3.1                | 3.5                       | 3.6                        | 3.7                       |
| Average #donations per Both         | 3.0                | 3.2               | 3.0                | 3.0               | 3.4                | 3.5               | 3.3                | 3.0               | 3.3                | 3.3               | 3.2                | 3.6                       | 3.7                        | 3.8                       |
| Average #donations per None         | 1.1                | 1.1               | 1.1                | 1.1               | 1.1                | 1.1               | 1.1                | 1.2               | 1.2                | 1.2               | 1.2                | 1.5                       | 1.5                        | 1.6                       |
| Average units per WB                | 1.9                | 1.8               | 1.6                | 1.4               | 1.5                | 1.5               | 1.5                | 1.5               | 1.8                | 1.6               | 1.6                | 2.4                       | 2.4                        | 2.6                       |
| Average units per PLT               | 3.6                | 3.6               | 3.5                | 3.1               | 3.6                | 3.8               | 3.7                | 3.5               | 4.5                | 4.3               | 4.9                | 5.8                       | 6.4                        | 6.6                       |
| Average units per Both              | 4.9                | 5.2               | 4.8                | 4.5               | 5.3                | 5.3               | 5.2                | 4.3               | 4.9                | 4.8               | 5.0                | 5.8                       | 6.3                        | 6.7                       |
| Average units per None              | 1.6                | 1.5               | 1.4                | 1.3               | 1.4                | 1.3               | 1.4                | 1.4               | 1.5                | 1.4               | 1.5                | 2.0                       | 2.2                        | 2.5                       |

**Bold cross-sections** denote the ones after the ban on family/replacement donation.

<sup>a</sup>"None"=no blood donation history; "WB"=whole blood donation history only; "PLT"=plateletpheresis donation history only; "Both"=both whole blood and plateletpheresis donations history.
