# Supplementary material for: The apheresis platelet donation was increased after a nationwide ban on family/replacement donation in China
Source: Springer Nature journal article supplement (doi:10.1186/s12889-021-10819-4), 2021-04-29
Supplement: MOESM5 [file 19118314]

**Additional file 5. Comparisons of average plateletpheresis donation units per donor before and after the ban for individuals**

|                                     | Average Plateletpheresis Donation Units Per Donor |              |                      |       |         | Average Plateletpheresis Donation Units Per Donor |              |                      |       |        |
|-------------------------------------|---------------------------------------------------|--------------|----------------------|-------|---------|---------------------------------------------------|--------------|----------------------|-------|--------|
|                                     | Before Ban                                        | After Ban    | Mean Difference (SE) | t     | p       | Before Ban                                        | After Ban    | Mean Difference (SE) | t     | p      |
|                                     | Mean (SD), n                                      | Mean (SD), n |                      |       |         | Mean (SD), n                                      | Mean (SD), n |                      |       |        |
| <b>Overall GZ set</b>               |                                                   |              |                      |       |         |                                                   |              |                      |       |        |
| Total                               | 1.7(0.1),11                                       | 2.9(0.2),3   | 1.1(0.1)             | 9.19  | 0.0096  | 2.8(0.1),11                                       | 5.1(0.4),3   | 2.3(0.1)             | 9.60  | 0.0097 |
| Gender                              |                                                   |              |                      |       |         |                                                   |              |                      |       |        |
| male                                | 1.9(0.1),11                                       | 3.2(0.2),3   | <b>1.3(0.1)</b>      | 13.17 | 0.0041  | 3.1(0.1),11                                       | 5.7(0.4),3   | <b>2.6(0.2)</b>      | 10.90 | 0.0074 |
| female                              | 1.4(0.1),11                                       | 1.9(0.1),3   | 0.6(0.1)             | 11.28 | <0.0001 | 2.0(0.1),11                                       | 3.1(0.3),3   | 1.1(0.1)             | 7.09  | 0.0164 |
| Age                                 |                                                   |              |                      |       |         |                                                   |              |                      |       |        |
| ≤35 years                           | 1.6(0.1),11                                       | 2.6(0.2),3   | 1.0(0.1)             | 11.62 | 0.0057  | 2.6(0.1),11                                       | 4.6(0.4),3   | 2.1(0.2)             | 8.53  | 0.0120 |
| >35 years                           | 2.2(0.1),11                                       | 3.5(0.2),3   | 1.3(0.1)             | 10.99 | 0.0047  | 3.7(0.3),11                                       | 6.4(0.5),3   | 2.7(0.3)             | 9.89  | 0.0054 |
| Blood donation history <sup>a</sup> |                                                   |              |                      |       |         |                                                   |              |                      |       |        |
| WB                                  | 1.2(<0.1),11                                      | 1.9(<0.1),3  | 0.7(<0.1)            | 55.9  | <0.0001 | 1.8(0.1),11                                       | 3.1(0.1),3   | 1.3(0.1)             | 18.46 | 0.0009 |
| PLT                                 | 2.6(0.1),11                                       | 3.6(0.2),3   | <b>1.0(0.1)</b>      | 10.25 | 0.0080  | 4.4(0.2),11                                       | 6.6(0.4),3   | <b>2.2(0.2)</b>      | 10.32 | 0.0063 |
| Both                                | 3.3(0.2),11                                       | 4.0(0.2),3   | 0.7(0.1)             | 6.27  | 0.0049  | 5.9(0.3),11                                       | 7.3(0.5),3   | 1.5(0.3)             | 5.18  | 0.0206 |
| None                                | 1.2(<0.1),11                                      | 1.6(0.2),3   | 0.5(0.1)             | 5.16  | 0.0320  | 1.7(0.1),11                                       | 2.6(0.3),3   | 0.9(0.2)             | 5.95  | 0.0245 |
| FRD:                                |                                                   |              |                      |       |         |                                                   |              |                      |       |        |
| FRD                                 |                                                   |              |                      |       |         |                                                   |              |                      |       |        |
| voluntary                           | 2.3(0.2),11                                       | 2.9(0.2),3   | 0.6(0.1)             | 4.19  | 0.0198  | 3.8(0.4),11                                       | 5.1(0.4),3   | 1.2(0.3)             | 4.72  | 0.0180 |
| <b>Overall CD set</b>               |                                                   |              |                      |       |         |                                                   |              |                      |       |        |
| Total                               | 1.5(0.1),11                                       | 2.6(0.3),3   | 1.1(0.1)             | 11.39 | <0.0001 | 2.1(0.2),11                                       | 4.4(0.6),3   | 2.3(0.2)             | 7.07  | 0.0156 |
| Gender:                             |                                                   |              |                      |       |         |                                                   |              |                      |       |        |
| male                                | 1.6(0.2),11                                       | 3.0(0.3),3   | <b>1.4(0.2)</b>      | 12.51 | <0.0001 | 2.2(0.2),11                                       | 5.1(0.7),3   | <b>2.8(0.4)</b>      | 6.91  | 0.0171 |
| female                              | 1.3(0.1),11                                       | 2.0(0.1),3   | 0.6(0.1)             | 10.32 | <0.0001 | 1.8(0.2),11                                       | 3.0(0.5),3   | 1.2(0.2)             | 4.56  | 0.0385 |
| Age                                 |                                                   |              |                      |       |         |                                                   |              |                      |       |        |
| ≤35 years                           | 1.4(0.1),11                                       | 2.6(0.2),3   | 1.2(0.1)             | 9.42  | 0.0049  | 2.0(0.2),11                                       | 4.3(0.5),3   | 2.3(0.3)             | 7.68  | 0.0119 |
| >35 years                           | 1.6(0.1),11                                       | 2.7(0.3),3   | 1.1(0.2)             | 6.24  | 0.0207  | 2.2(0.2),11                                       | 4.4(0.8),3   | 2.2(0.4)             | 4.99  | 0.0345 |
| Blood donation history <sup>a</sup> |                                                   |              |                      |       |         |                                                   |              |                      |       |        |
| WB                                  | 1.3(0.1),11                                       | 1.7(0.1),3   | 0.4(<0.1)            | 9.28  | 0.0002  | 1.6(0.2),11                                       | 2.5(0.1),3   | 0.9(0.1)             | 10.47 | 0.0003 |
| PLT                                 | 2.5(0.3),11                                       | 3.6(0.1),3   | <b>1.1(0.1)</b>      | 9.63  | <0.0001 | 3.8(0.5),11                                       | 6.3(0.4),3   | <b>2.4(0.3)</b>      | 8.48  | 0.0011 |
| Both                                | 3.2(0.2),11                                       | 3.7(0.1),3   | 0.5(0.1)             | 6.33  | 0.0007  | 4.9(0.3),11                                       | 6.3(0.5),3   | 1.3(0.3)             | 4.82  | 0.0237 |
| None                                | 1.1(0.1),11                                       | 1.5(0.1),3   | 0.4(<0.1)            | 10.83 | 0.0020  | 1.4(0.1),11                                       | 2.2(0.3),3   | 0.8(0.1)             | 5.45  | 0.0275 |
| FRD status                          |                                                   |              |                      |       |         |                                                   |              |                      |       |        |
| FRD                                 | NA                                                | NA           | NA                   | NA    | NA      | NA                                                | NA           | NA                   | NA    | NA     |
| voluntary                           | 1.9(0.3),11                                       | 2.6(0.3),3   | 0.7(0.2)             | 4.00  | 0.0136  | 2.8(0.5),11                                       | 4.4(0.6),3   | 1.6(0.4)             | 4.43  | 0.0221 |

**Bold** font indicates statistical significance for the indicated group vs. other group(s) within the same variable at the  $\alpha=0.05$  level. Z-test was used to compare two mean differences:  $Z=(\text{mean difference1}-\text{mean difference2})/\sqrt{(\text{se1}^2+\text{se2}^2)}$ , two-tailed.

<sup>a</sup>"None"=no blood donation history; "WB"=whole blood donation history only; "PLT"=plateletpheresis donation history only; "Both"=both whole blood and plateletpheresis donations history.
