# Supplementary material for: The apheresis platelet donation was increased after a nationwide ban on family/replacement donation in China
Source: Springer Nature journal article supplement (doi:10.1186/s12889-021-10819-4), 2021-04-29
Supplement: MOESM6 [file 19118314]

**Additional file 6. Comparison of average plateletpheresis units per donor in both datasets.**

|                                      | <b>Mean Difference</b> | <b>95% CI of Mean</b> | <b>p</b> |
|--------------------------------------|------------------------|-----------------------|----------|
| <b>Overall GZ Set</b>                |                        |                       |          |
| Voluntary Before vs. Voluntary After | 1.2                    | 0.7~1.7               | <0.0001  |
| Voluntary Before vs. FRD             | 2.2                    | 1.9~2.6               | <0.0001  |
| Voluntary After vs. FRD              | 3.4                    | 3.0~3.9               | <0.0001  |
| <b>Overall CD Set</b>                |                        |                       |          |
| Voluntary Before vs. Voluntary After | 1.6                    | 0.9~2.2               | <0.0001  |
| Voluntary Before vs. FRD             | 1.5                    | 1.1~1.9               | <0.0001  |
| Voluntary After vs. FRD              | 3.0                    | 2.4~3.7               | <0.0001  |
| <b>Overall GZ vs Overall CD</b>      | 0.7                    | -0.04~1.5             | 0.0644   |
