# Supplementary material for: The apheresis platelet donation was increased after a nationwide ban on family/replacement donation in China
Source: Springer Nature journal article supplement (doi:10.1186/s12889-021-10819-4), 2021-04-29
Supplement: MOESM7 [file 19118314]

**Additional file 7. Characteristics of two independent pseudo-panel datasets (the number of plateletpheresis donors per cell  $\geq 30$ )**

| Gender                | Birth year | Blood donation history <sup>a</sup>                 |                                        |                                        |                                        | Total |
|-----------------------|------------|-----------------------------------------------------|----------------------------------------|----------------------------------------|----------------------------------------|-------|
|                       |            | None                                                | WB                                     | PLT                                    | Both                                   |       |
|                       |            | Number of cross-sections<br>(Min, Max) <sup>b</sup> | Number of cross-sections<br>(Min, Max) | Number of cross-sections<br>(Min, Max) | Number of cross-sections<br>(Min, Max) |       |
| <b>Overall GZ Set</b> |            |                                                     |                                        |                                        |                                        |       |
| Male                  | 1952-1974  | 14(63,489)                                          | 14(79,140)                             | 14(156,234)                            | 14(220,338)                            | 56    |
| Male                  | 1975-1984  | 14(114,1051)                                        | 14(158,352)                            | 14(312,435)                            | 14(281,460)                            | 56    |
| Male                  | 1985-2001  | 14(897,3528)                                        | 14(329,947)                            | 14(737,1478)                           | 14(356,1226)                           | 56    |
| Female                | 1952-1974  | 11(79,237)                                          | 11(30,55)                              | 14(51,80)                              | 14(42,77)                              | 50    |
| Female                | 1975-1984  | 14(55,425)                                          | 14(41,102)                             | 14(53,87)                              | 14(36,63)                              | 56    |
| Female                | 1985-2001  | 14(409,1396)                                        | 14(191,408)                            | 14(246,357)                            | 14(149,443)                            | 56    |
| Total                 |            | 81                                                  | 81                                     | 84                                     | 84                                     | 330   |
| <b>Overall CD Set</b> |            |                                                     |                                        |                                        |                                        |       |
| Male                  | 1952-1974  | 14(51,648)                                          | 14(44,173)                             | 14(73,115)                             | 14(91,174)                             | 56    |
| Male                  | 1975-1984  | 14(79,807)                                          | 14(47,144)                             | 14(98,151)                             | 14(89,154)                             | 56    |
| Male                  | 1985-2001  | 14(585,2481)                                        | 14(148,440)                            | 14(207,851)                            | 14(132,475)                            | 56    |
| Female                | 1952-1974  | 14(79,318)                                          | 11(31,160)                             | 12(32,71)                              | 12(30,125)                             | 49    |
| Female                | 1975-1984  | 14(57,279)                                          | 14(36,70)                              | 10(32,55)                              | 5(30,67)                               | 43    |
| Female                | 1985-2001  | 14(398,975)                                         | 14(75,230)                             | 14(76,286)                             | 14(48,201)                             | 56    |
| Total                 |            | 84                                                  | 81                                     | 78                                     | 73                                     | 316   |

<sup>a</sup>"None"=no blood donation history; "WB"=whole blood donation history only; "PLT"=plateletpheresis donation history only; "Both"=both whole blood and plateletpheresis donations history.

<sup>b</sup>Values in bracket are the minimum and maximum number of individual platelet donors in the cells across all involved cross-sections.
