# Supplementary material for: The apheresis platelet donation was increased after a nationwide ban on family/replacement donation in China
Source: Springer Nature journal article supplement (doi:10.1186/s12889-021-10819-4), 2021-04-29

**Additional file 8. Examinations of the assumptions – normality and homoscedasticity of errors for the final mixed effects models derived from overall GZ (panels A and B) and CD (panels C and D) pseudo-panel datasets.**

Panels A and C present marginal Pearson residual plots, which are for the consideration of fixed effects only. Panels B and D visualize conditional Pearson residual plots, which are for the consideration of both fixed and random effects. The plot residuals vs. predicted outcome mean is used for examining the homoscedasticity assumption whereas the plots percent vs. residual and residual vs. quantile are used for visualizing the normality assumption. The variable "pv" represents outcome, i.e., average units of platelet per donor.

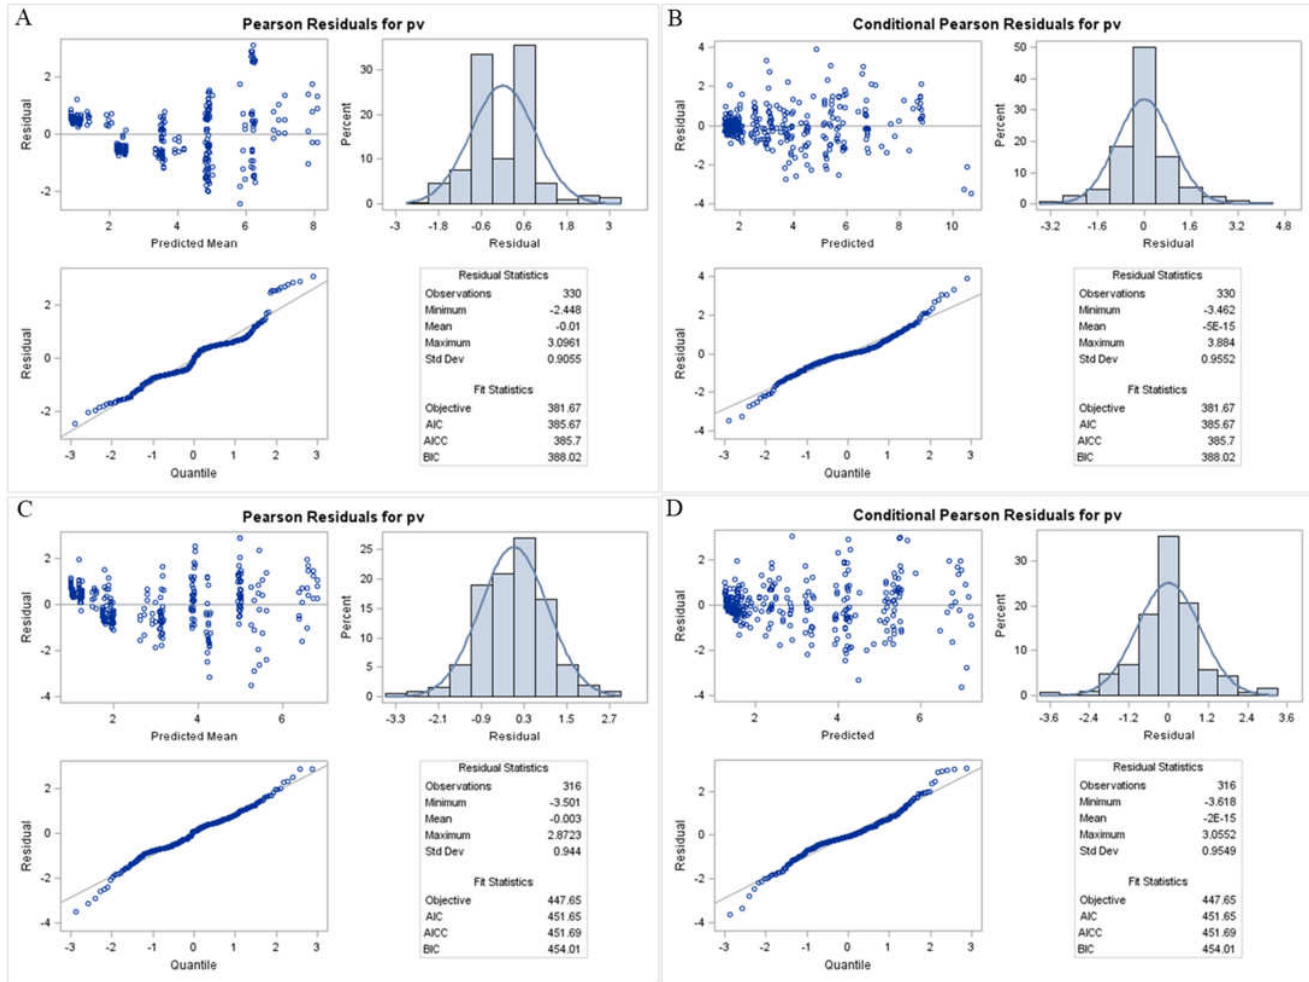

Supplement: MOESM8 [file 19118314]
