# Supplementary material for: The apheresis platelet donation was increased after a nationwide ban on family/replacement donation in China
Source: Springer Nature journal article supplement (doi:10.1186/s12889-021-10819-4), 2021-04-29
Supplement: MOESM9 [file 19118314]

**Additional file 9. Five-fold cross-validation of the final models for overall pseudo-panel datasets**

|                                                        | Overall GZ Set | Overall CD Set |
|--------------------------------------------------------|----------------|----------------|
| RMSE1                                                  | 1.0109         | 0.6282         |
| RMSE2                                                  | 0.8635         | 0.5398         |
| RMSE3                                                  | 1.0305         | 0.6885         |
| RMSE4                                                  | 0.9045         | 0.5328         |
| RMSE5                                                  | 1.0134         | 0.5433         |
| AverageRMSE <sub>(cross-validation)</sub> <sup>a</sup> | 0.9669         | 0.5898         |
| RMSE <sub>(full sample)</sub>                          | 0.9642         | 0.5753         |
| $\Delta$ RMSE <sup>b</sup>                             | 0.0027         | 0.0145         |
| % change in RMSE <sup>c</sup>                          | 0.2800         | 2.5204         |

<sup>a</sup>AverageRMSE<sub>(cross-validation)</sub> =  $\text{SQRT}((\text{RMSE}_1^2 + \text{RMSE}_2^2 + \dots + \text{RMSE}_5^2)/5)$

<sup>b</sup> $\Delta$ RMSE = Average RMSE<sub>(cross-validation)</sub> - RMSE<sub>(full sample)</sub>

<sup>c</sup>% change in RMSE =  $\Delta$ RMSE  $\times$  100 / RMSE<sub>(full sample)</sub>
