# Supplementary material for: The apheresis platelet donation was increased after a nationwide ban on family/replacement donation in China
Source: Springer Nature journal article supplement (doi:10.1186/s12889-021-10819-4), 2021-04-29
Supplement: MOESM10 [file 19118314]

**Additional file 10. Characteristics of two independent pseudo-panel datasets (the number of plateletpheresis donors per cell  $\geq 30$ )**

| Gender                     | Birth year | Blood donation history <sup>a</sup>                 |                                        |                                        |                                        | Total |
|----------------------------|------------|-----------------------------------------------------|----------------------------------------|----------------------------------------|----------------------------------------|-------|
|                            |            | None                                                | WB                                     | PLT                                    | Both                                   |       |
|                            |            | Number of cross-sections<br>(Min, Max) <sup>b</sup> | Number of cross-sections<br>(Min, Max) | Number of cross-sections<br>(Min, Max) | Number of cross-sections<br>(Min, Max) |       |
| <b>Voluntary GZ Subset</b> |            |                                                     |                                        |                                        |                                        |       |
| Male                       | 1952-1974  | 14(63,186)                                          | 9(33,111)                              | 14(138,205)                            | 14(211,338)                            | 51    |
| Male                       | 1975-1984  | 14(114,460)                                         | 14(42,209)                             | 14(265,353)                            | 14(246,460)                            | 56    |
| Male                       | 1985-2001  | 14(625,2384)                                        | 14(135,719)                            | 14(681,1 409)                          | 14(324,1 226)                          | 56    |
| Female                     | 1952-1974  | 10(32,98)                                           | 2(31,36)                               | 14(48,71)                              | 14(38,77)                              | 40    |
| Female                     | 1975-1984  | 14(53,174)                                          | 4(37,52)                               | 14(35,66)                              | 9(30,63)                               | 41    |
| Female                     | 1985-2001  | 14(260,768)                                         | 14(90,408)                             | 14(213,328)                            | 14(125,443)                            | 56    |
| Total                      |            | 80                                                  | 57                                     | 84                                     | 79                                     | 300   |
| <b>Voluntary CD Subset</b> |            |                                                     |                                        |                                        |                                        |       |
| Male                       | 1952-1974  | 14(37,340)                                          | 12(31,173)                             | 14(63,110)                             | 14(82,174)                             | 54    |
| Male                       | 1975-1984  | 14(65,407)                                          | 14(32,102)                             | 14(78,137)                             | 14(78,154)                             | 56    |
| Male                       | 1985-2001  | 14(432,1 037)                                       | 14(122,287)                            | 14(177,851)                            | 14(123,475)                            | 56    |
| Female                     | 1952-1974  | 10(49,218)                                          | 6(44,160)                              | 8(30,68)                               | 10(33,125)                             | 34    |
| Female                     | 1975-1984  | 10(49,195)                                          | 7(31,70)                               | 6(34,55)                               | 5(30,67)                               | 28    |
| Female                     | 1985-2001  | 14(209,540)                                         | 14(63,225)                             | 14(64,286)                             | 14(43,201)                             | 56    |
| Total                      |            | 76                                                  | 67                                     | 70                                     | 71                                     | 284   |

<sup>a</sup>"None"=no blood donation history; "WB"=whole blood donation history only; "PLT"=plateletpheresis donation history only; "Both"=both whole blood and plateletpheresis donations history.

<sup>b</sup>Values in bracket are the minimum and maximum number of individual donors in the cells across all involved cross-sections.
