# Supplementary material for: The apheresis platelet donation was increased after a nationwide ban on family/replacement donation in China
Source: Springer Nature journal article supplement (doi:10.1186/s12889-021-10819-4), 2021-04-29
Supplement: MOESM11 [file 19118314]

**Additional file 11. Final models derived from independent voluntary pseudo-panel datasets – voluntary GZ subset and voluntary CD subset**

|                                      | Voluntary GZ Subset <sup>a</sup> |        |                 | Voluntary CD Subset <sup>b</sup> |        |                 |
|--------------------------------------|----------------------------------|--------|-----------------|----------------------------------|--------|-----------------|
|                                      | $\beta$                          | SE     | p               | $\beta$                          | SE     | p               |
| Intercept                            | 0.6304                           | 0.4531 | 0.1797          | 0.7783                           | 0.2395 | <b>0.0037</b>   |
| timeBefore11                         | 0.0400                           | 0.0085 | < <b>0.0001</b> | 0.0499                           | 0.0099 | < <b>0.0001</b> |
| timeAfter11                          | 0.0588                           | 0.0115 | < <b>0.0001</b> | 0.0583                           | 0.0114 | < <b>0.0001</b> |
| Gender                               |                                  |        |                 |                                  |        |                 |
| male vs. female                      | 1.6519                           | 0.4042 | <b>0.0006</b>   | 0.9285                           | 0.2110 | <b>0.0003</b>   |
| Blood donation history <sup>c</sup>  |                                  |        |                 |                                  |        |                 |
| WB vs. none                          | 0.5769                           | 0.5745 | 0.3274          | 0.2575                           | 0.2971 | 0.3963          |
| PLT vs. none                         | 3.0199                           | 0.5689 | < <b>0.0001</b> | 2.3244                           | 0.2965 | < <b>0.0001</b> |
| Both vs. none                        | 4.3436                           | 0.5692 | < <b>0.0001</b> | 3.2595                           | 0.2966 | < <b>0.0001</b> |
| timeAfter11×gender                   |                                  |        |                 |                                  |        |                 |
| time×male vs. time×female            | 0.0307                           | 0.0092 | <b>0.0009</b>   | 0.0185                           | 0.0098 | 0.0610          |
| timeAfter11×history                  |                                  |        |                 |                                  |        |                 |
| time×WB vs. time×none                | 0.0019                           | 0.0137 | 0.8880          | 0.0019                           | 0.0137 | 0.8883          |
| time×PLT vs. time×none <sup>d</sup>  | 0.0390                           | 0.0125 | <b>0.0021</b>   | 0.1219                           | 0.0136 | < <b>0.0001</b> |
| time×Both vs. time×none <sup>d</sup> | 0.0133                           | 0.0126 | 0.2928          | 0.0484                           | 0.0136 | <b>0.0005</b>   |

<sup>a</sup>Model equation for voluntary GZ subset can be draw as: average platelet units per donor=0.6304 + 0.0400\*timeBefore11 + 0.0588\*timeAfter11 + 1.6519\*(gender=male) + 0.0000\*(gender=female) + 0.5769\*(history=WB) + 3.0199\*(history=PLT) + 4.3436\*(history=Both) + 0.0000\*(history=None) + 0.0307\*timeAfter11\*(gender=male) + 0.0000\*timeAfter11\*(gender=female) + 0.0019\*timeAfter11\*(history=WB) + 0.0390\*timeAfter11\*(history=PLT) + 0.0133\*timeAfter11\*(history=Both) + 0.0000\*timeAfter11\*(history=None).

<sup>b</sup>Model equation for voluntary CD subset can be draw as: average platelet units per donor=0.7783 + 0.0499\*timeBefore11 + 0.0583\*timeAfter11 + 0.9285\*(gender=male) + 0.0000\*(gender=female) + 0.2575\*(history=WB) + 2.3244\*(history=PLT) + 3.2595\*(history=Both) + 0.0000\*(history=None) + 0.0185\*timeAfter11\*(gender=male) + 0.0000\*timeAfter11\*(gender=female) + 0.0019\*timeAfter11\*(history=WB) + 0.1219\*timeAfter11\*(history=PLT) + 0.0484\*timeAfter11\*(history=Both) + 0.0000\*timeAfter11\*(history=None).

<sup>c</sup>Values in bracket are the minimum and maximum number of individual donors in the cells across all involved cross-sections.

<sup>d</sup>The difference of the outcome change between time\*PLT and time\*Both was tested using  $Z = \frac{\beta_2 - \beta_1}{\sqrt{SE_1^2 + SE_2^2}}$ ,  $\alpha = 0.05$ , one-tailed. For voluntary CD subset:  $Z = 3.821$ ,  $p < 0.0001$ .

**Bold** values denote statistical significance.
