# Supplementary material for: The apheresis platelet donation was increased after a nationwide ban on family/replacement donation in China
Source: Springer Nature journal article supplement (doi:10.1186/s12889-021-10819-4), 2021-04-29
Supplement: MOESM13 [file 19118314]

**Additional file 13. Five-fold cross-validation for the final models of voluntary pseudo-panel datasets.**

|                                                         | Voluntary GZ Subset | Voluntary CD Subset |
|---------------------------------------------------------|---------------------|---------------------|
| RMSE1                                                   | 1.1226              | 0.6458              |
| RMSE2                                                   | 0.8873              | 0.6756              |
| RMSE3                                                   | 1.0672              | 0.7114              |
| RMSE4                                                   | 1.0631              | 0.5327              |
| RMSE5                                                   | 0.8710              | 0.6045              |
| Average RMSE <sub>(cross-validation)</sub> <sup>a</sup> | 1.0313              | 0.6370              |
| RMSE <sub>(full sample)</sub>                           | 0.9856              | 0.6329              |
| $\Delta$ RMSE <sup>b</sup>                              | 0.0457              | 0.0041              |
| % change in RMSE <sup>c</sup>                           | 4.6368              | 0.6478              |

<sup>a</sup>Average RMSE<sub>(cross-validation)</sub> =  $\text{SQRT}((\text{RMSE}_1^2 + \text{RMSE}_2^2 + \dots + \text{RMSE}_5^2)/5)$ .

<sup>b</sup> $\Delta$ RMSE = Average RMSE<sub>(cross-validation)</sub> - RMSE<sub>(full sample)</sub>.

<sup>c</sup>%change in RMSE =  $\Delta$ RMSE $\times$ 100/ RMSE<sub>(full sample)</sub>.
